RESEARCH ARTICLE

# Resistance to commonly used insecticides and phosphine fumigant in red palm weevil, *Rhynchophorus ferrugineus* (Olivier) in Pakistan

Waqas Wakil<sup>1\*</sup>, Muhammad Yasin<sup>1,2</sup>, Mirza Abdul Qayyum<sup>1,3</sup>, Muhammad Usman Ghazanfar<sup>4</sup>, Abdullah M. Al-Sadi<sup>5</sup>, Geoffrey O. Bedford<sup>6</sup>, Yong Jung Kwon<sup>7</sup>

**1** Department of Entomology, University of Agriculture, Faisalabad, Pakistan, **2** College of Agriculture, Bahauddin Zakariya University Bahadur Sub-Campus, Layyah, Pakistan, **3** Department of Entomology, Muhammad Nawaz Shareef University of Agriculture, Multan, Pakistan, **4** Department of Plant Pathology, College of Agriculture, University of Sargodha, Pakistan, **5** Department of Crop Sciences, College of Agricultural and Marine Sciences, Sultan Qaboos University, AlKhoud, Oman, **6** Department of Biological Sciences, Macquarie University, NSW, Australia, **7** College of Agriculture and Life Sciences, Kyungpook National University, Daegu, South Korea

\* [arid1972@yahoo.com](mailto:arid1972@yahoo.com), [waqaswakeel@hotmail.com](mailto:waqaswakeel@hotmail.com)

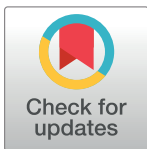

**OPEN ACCESS**

**Citation:** Wakil W, Yasin M, Qayyum MA, Ghazanfar MU, Al-Sadi AM, Bedford GO, et al. (2018) Resistance to commonly used insecticides and phosphine fumigant in red palm weevil, *Rhynchophorus ferrugineus* (Olivier) in Pakistan. PLoS ONE 13(7): e0192628. <https://doi.org/10.1371/journal.pone.0192628>

**Editor:** Maohua Chen, Northwest A&F University, CHINA

**Received:** August 29, 2017

**Accepted:** January 26, 2018

**Published:** July 19, 2018

**Copyright:** © 2018 Wakil et al. This is an open access article distributed under the terms of the [Creative Commons Attribution License](https://creativecommons.org/licenses/by/4.0/), which permits unrestricted use, distribution, and reproduction in any medium, provided the original author and source are credited.

**Data Availability Statement:** All relevant data are within the paper.

**Funding:** This study was financially supported (2AV1-263) by Higher Education Commission, Islamabad, Pakistan. The funder had no role in study design, data collection and analysis, decision to publish, or preparation of the manuscript.

**Competing interests:** The authors have declared that no competing interests exist.

## Abstract

The red palm weevil *Rhynchophorus ferrugineus* (Olivier) is an important pest of date palms in many regions of the world. This paper reports the first survey of insecticide resistance in field populations of *R. ferrugineus* in Pakistan which were collected from seven date palm growing areas across Punjab and Khyber Pakhtunkhwa (KPK) provinces, Pakistan. The resistance was assessed by the diet incorporation method against the formulated commonly used chemical insecticides profenophos, imidacloprid, chlorpyrifos, cypermethrin, deltamethrin, spinosad, lambda-cyhalothrin and a fumigant phosphine. Elevated levels of resistance were recorded for cypermethrin, deltamethrin and phosphine after a long history of insecticide use in Pakistan. Resistance Ratios (RRs) were 63- to 79-fold for phosphine, 16- to 74-fold for cypermethrin, 13- to 58-fold for deltamethrin, 2.6- to 44-fold for profenophos, 3- to 24-fold for chlorpyrifos, 2- to 12-fold for lambda-cyhalothrin and 1- to 10-fold for spinosad compared to a susceptible control line. Resistant *R. ferrugineus* populations were mainly found in southern Punjab and to some extent in KPK. The populations from Bahawalpur, Vehari, Layyah and Dera Ghazi Khan were most resistant to chemical insecticides, while all populations exhibited high levels of resistance to phosphine. Of the eight agents tested, lower LC<sub>50</sub> and LC<sub>90</sub> values were recorded for spinosad and lambda-cyhalothrin. These results suggest that spinosad and lambda-cyhalothrin exhibit unique modes of action and given their better environmental profile, these two insecticides could be used in insecticide rotation or assist in phasing out the use of older insecticides. A changed pattern of both insecticides can be used sensibly be recommended without evidence of dose rates and frequencies used.

## Introduction

Red Palm Weevil *Rhynchophorus ferrugineus* (Olivier) (Coleoptera: Curculionidae) is one of the most damaging insect pests of almost all kind of palms worldwide [1, 2, 3]. The larval stages damage host plants, usually remain in the lower 1 m of the tree trunk and can complete several generations within the same host [4, 5, 6]. So far it is established in 50% of date growing and 15% of coconut producing countries [1]. Early infestation cannot be detected and goes unnoticed. By the time the farmer recognizes the problem, the growing point (or cabbage) of the palm could have already been damaged with significant numbers of larvae developing inside the trunk generally resulting in the death of the palm [1, 7, 8].

Synthetic insecticides have been used as the principal control tactic of this pest. Insecticidal treatments with fumigants, soil drench, frond axil filling, trunk injections, wound dressing and crown drenching being the main strategies for *R. ferrugineus* control [9]. The efficacy of different chemical insecticides using various application methods singly and in mixtures has been studied [10, 11, 12, 13, 14, 15, 16, 17, 18].

In Pakistan, application of insecticides and fumigants on date palms against *R. ferrugineus* has a long history, but published records are lacking. Ten different insecticides were evaluated against *R. ferrugineus* during field trials and data showed fipronil, spirotetramat, chlorpyrifos and methidathion the most effective [19]. In Pakistan the effectiveness of commercially used insecticides has been questioned by the date palm growers. Reduced effectiveness of these insecticides may be due to the development of resistance, although, the mechanism of resistance against commonly used insecticides is poorly understood. A limited exploration of resistance development in *R. ferrugineus* is the focus of the current investigation. We selected seven commonly used insecticides and phosphine (aluminium phosphide), and assessed their effectiveness against geographically distinct populations of *R. ferrugineus* collected from seven different areas of Punjab and Khyber Pakhtunkhwa (KPK), Pakistan.

## Materials and methods

### *Rhynchophorus ferrugineus* collection and rearing

*Rhynchophorus ferrugineus* at different developmental stages were collected from fallen and infested date palm trees from various areas of Punjab and KPK during 2014–2015 (Fig 1). The areas were selected on the basis of long history of date palm cultivation and long term use of insecticides and phosphine. The application of insecticides here was regular and frequent but the palms had not been sprayed before insect collection. Adults, larvae and pupae were collected into separate plastic jars and brought back to the laboratory. In the laboratory larvae were provided with sugarcane (*Saccharum officinarum* L.; Poales: Poaceae) stems for food and as pupation site, while adults were offered shredded sugarcane pieces for both food and as an oviposition substrate in plastic boxes. Pupae were kept in separate boxes for adult emergence in incubators (Sanyo Corporation, Japan) at 27±2°C, 60±5 RH and photoperiod of 12:12 (D:L) hours. On emergence adults were transferred to jars for feeding and mating. The colonies were maintained in plastic boxes (15×30×30 cm) having a lid whose center (8-cm) diameter covered with mesh wire gauze (60 mesh) for aeration. Rearing was carried out at the Microbial Control Laboratory, Department of Entomology, University of Agriculture, Faisalabad, Pakistan. The adult food was changed after every three days and the removed sugarcane pieces were kept in separate jars for eggs to hatch. After egg hatch neonate larvae were transferred to sugarcane pieces for feeding until freshly molted 4<sup>th</sup> instar larvae were recovered. The laboratory strain which was used as the reference strain had been reared in the laboratory for over 25 generations since 2009 without exposure to insecticides and will be maintained for future research.

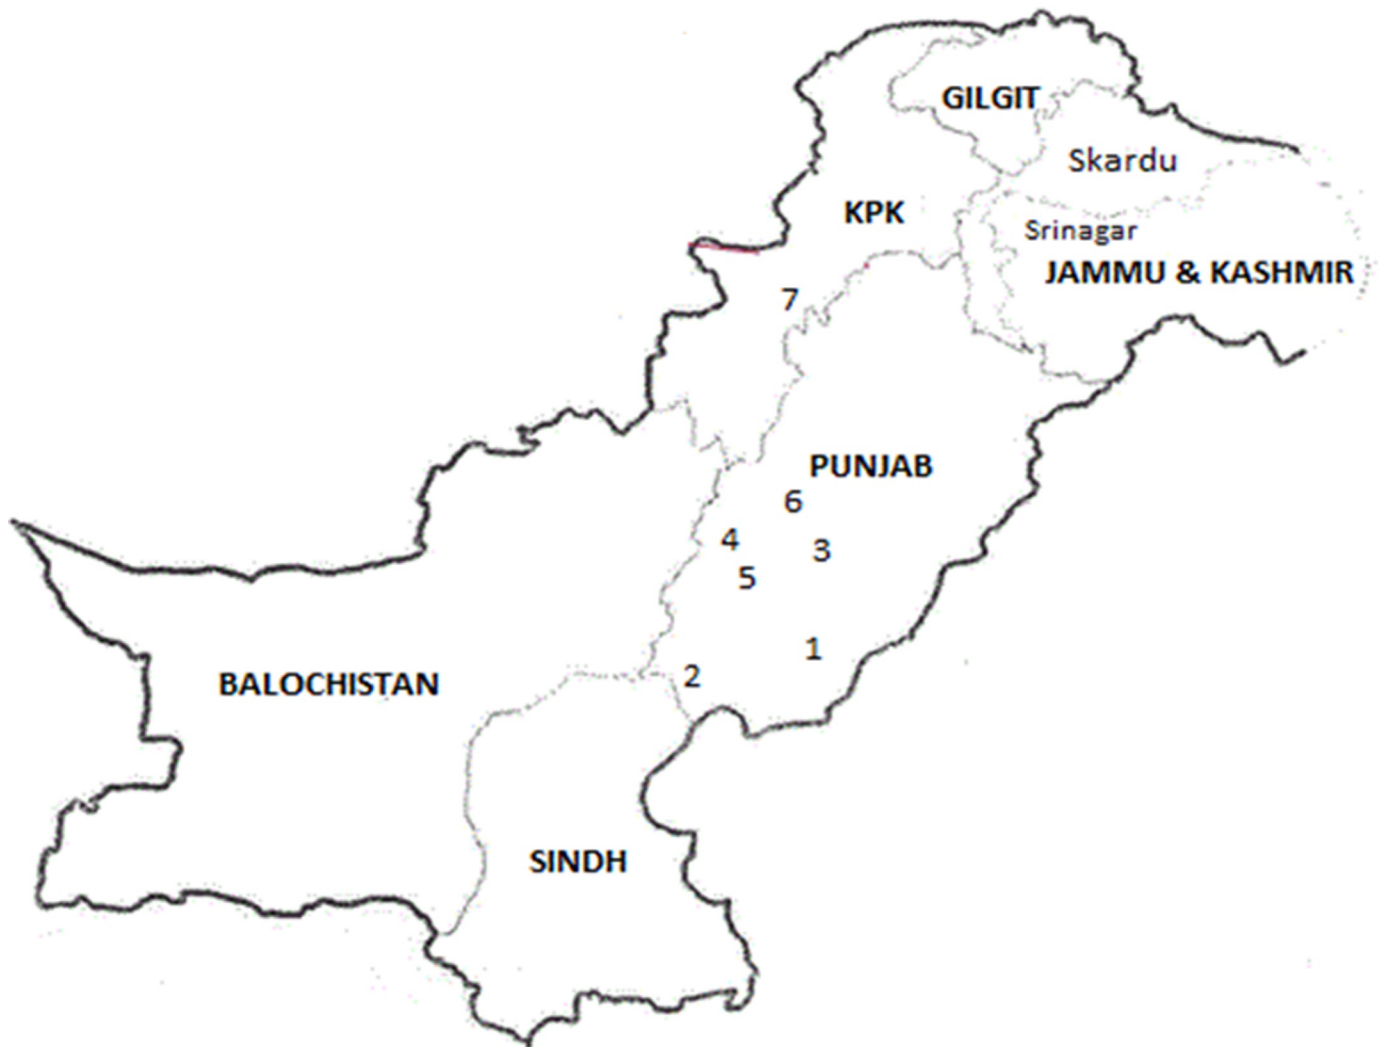

**Fig 1. Location of seven sampling sites for *R. ferrugineus* field populations in Punjab and KPK, Pakistan 1: Bahawalpur; 2: Rahim Yar Khan; 3: Vehari; 4: Dera Ghazi Khan; 5: Muzaffargarh; 6: Layyah; 7: Dera Ismail Khan.**

<https://doi.org/10.1371/journal.pone.0192628.g001>

Preliminary laboratory bioassays it showed highly susceptible to tested insecticides, being as susceptible as those used earlier [20].

### Test chemicals

For bioassays, commercial formulations of Curacron<sup>®</sup> (profenophos, 500 g/litre, 500 EC; Syngenta Pakistan Ltd., Karachi, Pakistan); Confidor<sup>®</sup> (imidacloprid, 700g/kg, 70 WG; Bayer Crop Sciences, Pakistan Pvt. Ltd., Karachi, Pakistan); Lorsban<sup>®</sup> (chlorpyrifos, 400 g/litre, 40 EC; Arysta Life Science Pakistan Pvt. Ltd., Karachi, Pakistan); Arrivo<sup>®</sup> (cypermethrin, 100 g/litre, 10% EC; FMC United Pvt. Ltd., Lahore, Pakistan), Deltamethrin<sup>®</sup> (deltamethrin, 25 g/litre, 2.5% EC; Target Agro Chemicals, Lahore, Pakistan); Tracer<sup>®</sup> (spinosad, 240 g/litre, 240 SC; Arysta Life Science, Pakistan Pvt. Ltd.), Karate<sup>®</sup> (lambda-cyhalothrin 50g/litre, 5 EC; Syngenta Pakistan Ltd., Karachi, Pakistan) were used and phosphine was generated using aluminum phosphide tablets (Celphos 56%; Jaffer Brothers (Pvt.) Ltd., Lahore, Pakistan).

## Generation of phosphine (PH<sub>3</sub>) gas

The phosphine gas was generated using the FAO method [21]. The apparatus for generation of phosphine gas consisted of a 5 litre beaker, a collection tube (cylinder), an inverted funnel, aluminum phosphide tablets and muslin cloth. Gas collection tube was sealed from one side with an air-tight rubber stopper and then was filled with 5% sulphuric acid (H<sub>2</sub>SO<sub>4</sub>) solution. Half of the beaker was also filled with 5% H<sub>2</sub>SO<sub>4</sub> solution. The gas collecting tube was placed carefully into the beaker over the inverted funnel in such a way that there is no loss of H<sub>2</sub>SO<sub>4</sub> solution from the collection tube, while dipping into the beaker. Before generating phosphine gas all air was removed from the collection tube. Then aluminum phosphide tablets (wrapped in muslin cloth) were placed under inverted funnel. Phosphine gas was then collected in the gas collecting tube inverted over the funnel. As the funnel filled with generated gas, the level of solution dropped down. When the collecting tube was filled, 5 ml gas was sucked out with the help of an air tight syringe and was injected into sealed desiccators of known volume, then 50 ml of gas was taken out from the desiccators and injected into a phosphine meter to measure gas concentration allowing the required concentrations of phosphine gas to be obtained.

## Bioassays

**Insecticides.** From each population freshly molted F<sub>1</sub> fourth-instar (L<sub>4</sub>) larvae of *R. ferrugineus* were challenged with the test insecticides. The F<sub>1</sub> generation was obtained by mass mating of the field collected weevils and the weevils emerged from field-collected larvae and pupae. Toxicity bioassays were performed using artificial diet (Agar, brewer's yeast, wheat germ, corn flour, ascorbic acid, benzoic acid, amino acid-vitamin mix, chloramphenicol and nipagin) [22]. Artificial diets were prepared by diluting the respective concentrations of commercial products in distilled water (mg litre<sup>-1</sup> of water) previously determined for each bioassay using Insecticide Resistance Action Committee (IRAC) Method No. 020 [23]. Accurate aqueous dilutions of each test chemical were prepared. For initial studies, eight widely spaced dose rates were used. Once a suitable range was identified a narrower range of six modified dose rates viz. 0, 20, 40, 60, 80 and 100 mg litre<sup>-1</sup> were utilized which provided mortality between 5–95% of *R. ferrugineus* larvae. In the control treatment, diet was prepared using distilled water. A piece of artificial diet from each treatment was offered to ten freshly molted L<sub>4</sub> larvae of *R. ferrugineus* individually in glass cups measuring (6×6 cm) with 40 mesh/inch screen lids for aeration and preventing the insects from escaping. All treatments were repeated three times and held at 27±2°C with 65±5% RH and a photoperiod of 12:12 (L: D) hours.

**Phosphine (PH<sub>3</sub>).** FAO Method No. 16 [21] was used on 4<sup>th</sup> instar larvae of *R. ferrugineus*. For each population, 10 larvae were placed individually, 1 in each of 10 glass cups and placed in 4 litre air tight glass boxes (serving as fumigation chambers) before phosphine fumigation. The cups had lids with tops made of 40 mesh/inch screen with 0.42-mm openings to permit fumigant entry and prevent from escaping. A small quantity of artificial diet (10 g) was added to each cup. The boxes were centrally equipped with a port on the metal screw on lid which was fitted with a rubber injection point which served as an entry point for phosphine. Before the lid was screwed onto the box, a rubber gasket was placed in it, and a thin layer of vacuum grease applied for a tight seal between the metal lid and the top edge to ensure gas was not leaking. Five phosphine concentrations (mg litre<sup>-1</sup>) were measured in preliminary toxicity assays against 4<sup>th</sup> instar larvae of *R. ferrugineus*. Another 4 litre box without any treatment served as control. The gas was introduced into each box containing *R. ferrugineus* larvae through the rubber septum by using a gas tight syringe after first removing an equivalent volume of air from the jar using a syringe. Two drops of water were added to each box using a syringe in order to maintain 70% RH inside the boxes. Boxes were then placed in an incubator maintained at 27±2°C. The boxes were opened 24

hours after application, concentration of phosphine in each jar was measured at the start and end of the exposure period, and an average concentration for the exposure period was calculated for each fumigation chamber. All the larvae from each treatment were placed on moistened filter paper and maintained at  $27\pm 2^{\circ}\text{C}$  and  $65\pm 5\%$  RH for a further 120 hours to allow recovery.

**Statistical analysis.** For insecticidal treatments, three days after the insects were removed from the insecticides treated-diet mortality counts were made in each treatment. However, for phosphine application individuals were exposed for 24h (+120 recovery hours) and then mortality was lumped together. Mortality data were corrected with Abbott's [24] formula to account for untreated (control) mortality. Corrected mortality data were subjected to Probit analysis [25] to calculate  $\text{LC}_{50}$  and  $\text{LC}_{90}$ .  $\text{LC}_{50}$ ,  $\text{LC}_{90}$  and 95% fiducial limits were estimated for each insecticide at each location. Resistance ratios (RRs) were determined at  $\text{LC}_{50}$  by dividing the lethal concentration (LC) values of each insecticide by the respective LC values determined for the laboratory susceptible strain. Resistance ratios were categorized using the system of [26], "no resistance" ( $\text{RR} \leq 1$ ), "very low" ( $\text{RR} = 2-10$ ), "low" ( $\text{RR} = 11-20$ ), "moderate" ( $\text{RR} = 21-50$ ), "high" ( $\text{RR} = 51-100$ ), and "very high" ( $\text{RR} > 100$ ).

## Results

### Imidacloprid

Resistance levels varied among the seven distinct field populations of *R. ferrugineus*. The degree of resistance varied from very low to low levels i.e. RR 2.10- to 17.68-fold for all the tested populations (Figs 1 and 2 and Table 1). A very low resistance level was recorded in Bahawalpur (2.10-fold), Dera Ismail Khan (2.86-fold), Vehari (4.20-fold) and Muzaffargarh (5.60-fold) populations at  $\text{LC}_{50}$  level. Low level of resistance was observed in populations of *R. ferrugineus* from Rahim Yar Khan (11.70-fold), Dera Ghazi Khan (15.12-fold) and Layyah (17.68-fold) at  $\text{LC}_{50}$  values.

### Spinosad

Very low level (1.02- to 9.77-fold) resistance ratios were recorded among different field populations of *R. ferrugineus* (Fig 2 and Table 1).

### Lambda-cyhalothrin

Very low to low levels (1.96- to 11.88-fold) RR were recorded (Fig 2 and Table 1).

### Chlorpyrifos

Very low and low to moderate levels (3.03- to 24.47-fold) RR were recorded among tested populations of *R. ferrugineus* (Fig 2 and Table 1).

### Profenophos

Very low and low to moderate levels (RR 2.65- to 44.10-fold) were recorded for profenophos among different field populations of *R. ferrugineus* (Fig 2 and Table 1).

### Deltamethrin

Low and moderate to high levels (RR 12.90- to 57.97-fold) of resistance were recorded among different field populations of *R. ferrugineus* (Fig 2 and Table 1).

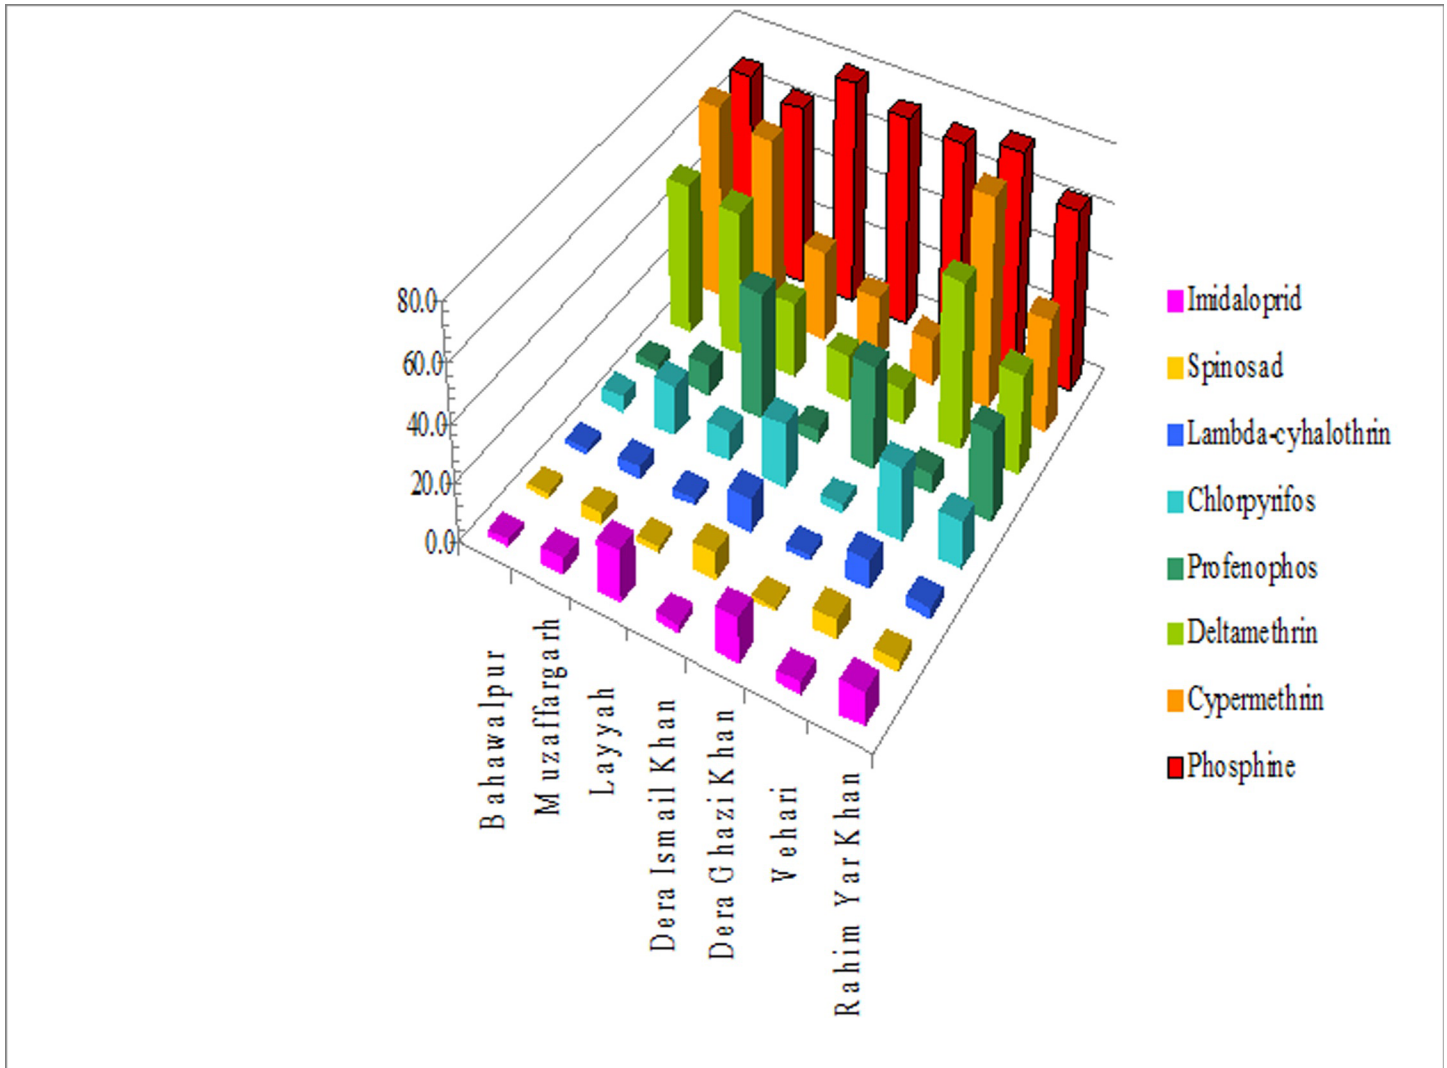

Fig 2. Resistance ratios (RR) of chemical insecticides and phosphine gas against a susceptible lab strain and field collected populations of *R. ferrugineus* from various localities in Punjab and KPK, Pakistan.

<https://doi.org/10.1371/journal.pone.0192628.g002>

### Cypermethrin

Low and moderate to high levels (RR 15.89- to 73.82-fold) of resistance were recorded among different field populations of *R. ferrugineus* (Fig 2 and Table 1).

### Phosphine

High levels of resistance were recorded against phosphine in all the tested populations of *R. ferrugineus*, ranging from 63.09- to 79.46-fold (Fig 2 and Table 1) with very little difference between populations.

### Discussion

Knowledge of the resistance status of pests is important for researchers to guide the farming community in combating pest problems. It could become helpful for growers to reduce or suspend the use of particular chemicals in their plantings. These seven areas we worked on are the

**Table 1. Resistance to commonly used insecticides and phosphine against susceptible strains and field collected populations of *R. ferrugineus*.**

| Insecticide        | Localities       | LC <sub>50</sub> (mg litre <sup>-1</sup> ) (95% fiducial limits) | LC <sub>90</sub> (mg litre <sup>-1</sup> ) (95% fiducial limits) | Slope     | Resistance Ratio | Heterogeneity | χ <sup>2</sup> |
|--------------------|------------------|------------------------------------------------------------------|------------------------------------------------------------------|-----------|------------------|---------------|----------------|
| Imidacloprid       | Bahawalpur       | 16.59 (12.09–23.41)                                              | 250.87 (197.42–314.98)                                           | 1.12±0.18 | 2.10             | 1.23          | 0.23           |
|                    | Muzaffargarh     | 44.22 (36.31–51.39)                                              | 669.08.16 (581.35.793.45)                                        | 1.42±0.19 | 5.60             | 1.46          | 0.06           |
|                    | Layyah           | 139.52 (108.54–195.02)                                           | 2112.86 (1984.81–2358.44)                                        | 2.50±0.22 | 17.68            | 3.67          | 0.49           |
|                    | Dera Ismail Khan | 22.64 (18.76–29.78)                                              | 341.52 (285.16–459.49)                                           | 1.34±0.20 | 2.86             | 2.04          | 0.03           |
|                    | Dera Ghazi Khan  | 119.37 (94.62–137.87)                                            | 1806.54 (1685.43–2132.38)                                        | 2.21±0.23 | 15.12            | 2.78          | 0.11           |
|                    | Vehari           | 33.19 (26.14–42.81)                                              | 501.51 (435.32–651.32)                                           | 1.23±0.19 | 4.20             | 1.16          | 1.05           |
|                    | Rahim Yar Khan   | 92.35 (79.37–117.69)                                             | 1397.43 (1258.15–1606.42)                                        | 1.36±0.21 | 11.70            | 2.61          | 2.25           |
|                    | Laboratory       | 7.89 (5.81–12.25)                                                | 119.48(106.03–148.11)                                            | 0.74±0.14 | -                | 2.48          | 0.47           |
| Spinosad           | Bahawalpur       | 7.98 (3.03–10.08)                                                | 128.22 (114.34–165.10)                                           | 0.92±0.16 | 2.03             | 2.17          | 1.02           |
|                    | Muzaffargarh     | 17.26 (14.96–22.82)                                              | 276.34 (204.28–385.40)                                           | 1.14±0.18 | 4.40             | 1.23          | 0.07           |
|                    | Layyah           | 9.32 (4.67–13.92)                                                | 150.22 (101.34–236.10)                                           | 1.06±0.15 | 2.37             | 0.67          | 0.00           |
|                    | Dera Ismail Khan | 38.30 (30.57–46.74)                                              | 620.75 (502.22–844.95)                                           | 1.42±0.19 | 9.77             | 2.02          | 1.76           |
|                    | Dera Ghazi Khan  | 3.98 (2.80–5.55)                                                 | 64.41 (42.16–97.84)                                              | 0.61±0.13 | 1.02             | 1.59          | 0.19           |
|                    | Vehari           | 28.06 (24.87–33.91)                                              | 454.23 (357.81–648.35)                                           | 1.12±0.17 | 7.15             | 1.07          | 0.07           |
|                    | Rahim Yar Khan   | 13.37 (10.75–17.21)                                              | 216.72 (141.38–321.18)                                           | 1.17±0.15 | 3.41             | 2.24          | 2.39           |
|                    | Laboratory       | 3.92 (2.89–5.63)                                                 | 63.56 (49.34–88.32)                                              | 0.69±0.14 | -                | 0.78          | 1.06           |
| Lambda-cyhalothrin | Bahawalpur       | 13.85 (10.51–18.83)                                              | 221.59 (165.41–352.82)                                           | 0.72±0.17 | 1.96             | 1.13          | 0.00           |
|                    | Muzaffargarh     | 32.29 (26.54–42.12)                                              | 535.51 (448.32–679.32)                                           | 1.21±0.19 | 4.72             | 1.54          | 0.06           |
|                    | Layyah           | 19.64 (15.31–24.44)                                              | 313.82 (217.46–416.10)                                           | 1.07±0.17 | 2.77             | 0.91          | 0.87           |
|                    | Dera Ismail Khan | 83.44 (73.39–95.72)                                              | 1347.16 (1081.84–1564.82)                                        | 1.61±0.21 | 11.88            | 2.08          | 1.62           |
|                    | Dera Ghazi Khan  | 14.15 (10.97–19.21)                                              | 228.76 (151.39–318.30)                                           | 0.72±0.15 | 2.01             | 0.42          | 0.04           |
|                    | Vehari           | 64.76 (56.34–71.72)                                              | 1045.11 (803.22–1281.35)                                         | 1.41±0.21 | 9.21             | 1.19          | 0.00           |
|                    | Rahim Yar Khan   | 26.44 (20.31–75.63)                                              | 425.93 (319.32–620.47)                                           | 1.33±0.20 | 3.76             | 1.75          | 1.38           |
|                    | Laboratory       | 7.02 (5.21–11.27)                                                | 113.48(102.03–130.10)                                            | 0.90±0.15 | -                | 2.27          | 0.06           |
| Chlorpyrifos       | Bahawalpur       | 44.21 (37.57–53.40)                                              | 611.92 (499.40–881.55)                                           | 1.22±0.19 | 5.45             | 1.52          | 1.04           |
|                    | Muzaffargarh     | 145.36 (117.57–174.38)                                           | 2011.35 (1861.65–2351.88)                                        | 2.42±0.21 | 17.91            | 1.05          | 2.21           |
|                    | Layyah           | 86.42 (73.70–105.08)                                             | 1195.43 (996.15–1440.42)                                         | 1.37±0.20 | 10.65            | 0.94          | 0.00           |
|                    | Dera Ismail Khan | 177.25 (145.86–197.65)                                           | 2452.54 (2275.47–2865.36)                                        | 2.31±0.21 | 21.84            | 1.21          | 0.08           |
|                    | Dera Ghazi Khan  | 24.61 (20.48–30.22)                                              | 340.55 (249.42–481.64)                                           | 1.72±0.19 | 3.03             | 1.66          | 3.10           |
|                    | Vehari           | 198.52 (146.54–237.53)                                           | 2747.67 (2505.43–3018.38)                                        | 2.55±0.20 | 24.47            | 0.87          | 1.93           |
|                    | Rahim Yar Khan   | 129.64 (97.54–182.38)                                            | 1794.75 (1598.89–2121.52)                                        | 2.31±0.18 | 15.98            | 1.34          | 0.04           |
|                    | Laboratory       | 8.11 (4.01–11.92)                                                | 112.29 (78.34–208.10)                                            | 0.97±0.16 | -                | 1.20          | 1.37           |
| Profenophos        | Bahawalpur       | 23.31 (19.18–27.71)                                              | 307.01 (261.52–377.90)                                           | 1.25±0.18 | 2.65             | 1.27          | 1.13           |
|                    | Muzaffargarh     | 92.19 (78.12–115.08)                                             | 1220.43 (1161.15–1383.42)                                        | 1.30±0.21 | 10.50            | 0.79          | 0.45           |
|                    | Layyah           | 387.26 (330.65–424.59)                                           | 5125.41 (4871.21–5561.27)                                        | 3.22±0.23 | 44.1             | 1.65          | 2.78           |
|                    | Dera Ismail Khan | 40.20 (32.98–46.87)                                              | 531.87 (414.23–680.45)                                           | 1.41±0.18 | 4.57             | 1.26          | 0.00           |
|                    | Dera Ghazi Khan  | 309.37 (286.17–353.53)                                           | 4093.08 (3814.56–4405.82)                                        | 2.53±0.18 | 35.22            | 1.07          | 1.04           |
|                    | Vehari           | 60.64 (52.34–67.72)                                              | 801.21 (719.22–1029.35)                                          | 1.41±0.17 | 6.90             | 0.34          | 2.72           |
|                    | Rahim Yar Khan   | 266.28 (224.23–305.29)                                           | 3522.54 (3368.83–3917.76)                                        | 2.56±0.20 | 30.31            | 1.86          | 3.57           |
|                    | Laboratory       | 8.78 (4.44–12.35)                                                | 116.22 (90.45–174.59)                                            | 0.99±0.16 | -                | 2.28          | 2.34           |
| Deltamethrin       | Bahawalpur       | 348.28 (296.65–374.59)                                           | 5729.41 (5204.21–6480.27)                                        | 3.61±0.23 | 53.81            | 1.43          | 1.12           |
|                    | Muzaffargarh     | 332.43 (283.65–365.59)                                           | 5469.41 (5108.21–5911.27)                                        | 3.36±0.21 | 51.37            | 1.22          | 0.45           |
|                    | Layyah           | 173.29 (144.54–199.65)                                           | 2849.54 (2617.47–3227.36)                                        | 2.31±0.20 | 26.76            | 0.89          | 0.01           |
|                    | Dera Ismail Khan | 106.34 (96.12–121.05)                                            | 1748.22 (1553.08–2092.29)                                        | 1.73±0.19 | 16.42            | 0.67          | 3.23           |
|                    | Dera Ghazi Khan  | 83.54 (73.24–92.11)                                              | 1373.16 (1202.84–1591.82)                                        | 1.54±0.17 | 12.90            | 1.39          | 0.89           |
|                    | Vehari           | 375.95 (329.65–411.59)                                           | 6172.41 (5728.21–6798.27)                                        | 3.52±0.23 | 57.97            | 1.81          | 0.06           |
|                    | Rahim Yar Khan   | 223.41 (194.36–284.66)                                           | 3675.76 (3339.78–4105.55)                                        | 2.72±0.21 | 34.52            | 2.87          | 0.00           |
|                    | Laboratory       | 6.47 (4.97–9.12)                                                 | 106.48(93.03–122.13)                                             | 0.71±0.14 | -                | 1.34          | 0.56           |

(Continued)

Table 1. (Continued)

| Insecticide  | Localities       | LC <sub>50</sub> (mg litre <sup>-1</sup> ) (95% fiducial limits) | LC <sub>90</sub> (mg litre <sup>-1</sup> ) (95% fiducial limits) | Slope     | Resistance Ratio | Heterogeneity | χ <sup>2</sup> |
|--------------|------------------|------------------------------------------------------------------|------------------------------------------------------------------|-----------|------------------|---------------|----------------|
| Cypermethrin | Bahawalpur       | 503.12 (454.22–583.48)                                           | 8127.65 (7875.63–8587.39)                                        | 3.72±0.23 | 69.49            | 0.67          | 3.49           |
|              | Muzaffargarh     | 565.54 (391.43–605.66)                                           | 7519.76 (7256.32–7991.18)                                        | 3.83±0.22 | 64.29            | 1.64          | 1.07           |
|              | Layyah           | 225.39 (201.57–267.29)                                           | 3638.02 (3425.25–4058.32)                                        | 2.59±0.20 | 31.11            | 2.01          | 0.06           |
|              | Dera Ismail Khan | 163.65 (139.23–204.32)                                           | 2641.58 (2470.43–2911.43)                                        | 2.48±0.19 | 22.59            | 1.83          | 2.34           |
|              | Dera Ghazi Khan  | 115.18 (94.12–128.11)                                            | 1859.64 (1715.76–2119.64)                                        | 2.16±0.21 | 15.89            | 1.23          | 0.00           |
|              | Vehari           | 534.47 (489.22–622.48)                                           | 8633.65 (7247.63–9211.39)                                        | 3.65±0.23 | 73.82            | 0.52          | 0.02           |
|              | Rahim Yar Khan   | 255.42 (233.23–311.23)                                           | 4609.54 (4266.83–5165.76)                                        | 2.81±0.21 | 39.41            | 1.96          | 2.83           |
|              | Laboratory       | 7.24 (5.39–11.23)                                                | 116.96(103.77–134.12)                                            | 0.71±0.19 | -                | 1.02          | 1.74           |
| Phosphine    | Bahawalpur       | 4008.70 (3280.23–4955.42)                                        | 51177.95 (43719.73–59088.76)                                     | 5.46±0.27 | 68.76            | 0.85          | 1.04           |
|              | Muzaffargarh     | 3718.37 (3011.23–4604.56)                                        | 47679.37 (42165.65–55248.54)                                     | 5.82±0.24 | 63.78            | 2.54          | 1.56           |
|              | Layyah           | 4632.51 (3846.43–5517.72)                                        | 59402.62 (51484.42–64804.32)                                     | 6.37±0.34 | 79.46            | 1.27          | 0.06           |
|              | Dera Ismail Khan | 4293.21 (3618.43–5180.41)                                        | 55048.84 (50342.23–62268.54)                                     | 6.20±0.30 | 73.64            | 1.51          | 1.12           |
|              | Dera Ghazi Khan  | 4214.50 (3529.43–5065.54)                                        | 54039.67 (50455.34–621180.23)                                    | 5.82±0.28 | 72.29            | 2.34          | 0.00           |
|              | Vehari           | 4448.33 (3750.43–5309.52)                                        | 57038.53 (50118.76–63308.37)                                     | 6.02±0.31 | 76.3             | 0.67          | 0.78           |
|              | Rahim Yar Khan   | 3678.14 (2972.23–4545.56)                                        | 47163.47 (42540.65–54540.84)                                     | 4.83±0.23 | 63.09            | 1.02          | 1.89           |
|              | Laboratory       | 58.3 (52.45–64.54)                                               | 747.56 (692.54–894.89)                                           | 1.48±0.21 | -                | 1.28          | 2.45           |

<https://doi.org/10.1371/journal.pone.0192628.t001>

major date producing areas of Pakistan and contribute the major share of the country’s date production and have a history of *R. ferrugineus* infestation stretching back almost 100 years [27]. To combat this pest, farmers have mainly used conventional insecticides and fumigants, particularly phosphine.

This is the first report of an insecticide-resistance investigation in *R. ferrugineus* in Pakistan. Populations of *R. ferrugineus* were established from field collections and all strains exhibited different susceptibility levels to all tested insecticides through dose-mortality bioassays, except for Dera Ghazi Khan strain for spinosad. LC<sub>50</sub> with overlapping confidence intervals compared to the susceptible strain. In our study a laboratory population was considered a reference strain which exhibited no resistance to the tested chemicals which was very close to [28]. Among the tested chemicals spinosad and lambda-cyhalothrin were the most effective and revealed a very low level of resistance and LC<sub>50</sub> in any tested population. The insecticides fed in an artificial diet to larvae caused mortality in a dose-dependent manner. The most consistent resistance across seven populations was recorded for deltamethrin and cypermethrin. High level of resistance to phosphine was observed in all populations. The current study provides a base line of resistance to cypermethrin, deltamethrin and phosphine against *R. ferrugineus*. In the strains examined low and moderate to high level of resistance was probably due to the excessive ineffective use of these chemical insecticides without knowing the chemistry and mode of action to manage *R. ferrugineus* in Pakistan.

The cryptic habit of *R. ferrugineus* facilitates almost year-round activity in date palm plantations which has forced the farmers to expose field populations to different chemical insecticides and fumigants in order to successfully control pest infestations. The repeated application of these chemical insecticides could then have led to the development of genetic resistance in *R. ferrugineus* populations. Resistance to cypermethrin and deltamethrin is common among arthropod pests worldwide. In Pakistan resistance against these commonly used insecticides in various crop pests such as in *Spodoptera exigua* (Hübner) (Lepidoptera: Noctuidae), *Brevicoryne brassicae* (L.) (Homoptera: Aphididae), *Spodoptera litura* (Fabricius) (Lepidoptera: Noctuidae), *Helicoverpa armigera* (Hübner) (Lepidoptera: Noctuidae) and *Bemisia tabaci* (Gennadius) (Homoptera: Aleyrodidae) has been reported by many scientists [28, 29, 30, 31, 32, 33, 34]. So



far only one published record of cypermethrin resistance against *R. ferrugineus* is reported, from Saudi Arabia [35]. Resistance to phosphine is not surprising because deployment of phosphine in the form of aluminum phosphide tablets is common practice among date palm farming community in Pakistan. Resistance to phosphine is common in stored grain insects such as *Tribolium castaneum* (Herbst.) (Coleoptera: Curculionidae), *Rhyzopertha dominica* (F.) (Coleoptera: Bostrichidae) and psocid species (Liposcelididae: Psocoptera) worldwide e.g. Opit et al. [36] reported 119 fold and 1500 fold resistance in *T. castaneum* and *R. dominica* strains respectively, collected from Oklahoma, USA. Many other researchers have reported phosphine resistance in stored product pests from all over the world [37].

It is advised not to use cypermethrin and deltamethrin against this pest and alternative chemicals such as spinosad and lambda-cyhalothrin should be utilized in control strategies. So far, there is no understanding of the genetics of resistance in this species or of any cross-resistance pattern. However, multiple resistances to conventional and new chemical insecticides have been recorded previously in Pakistan in other species, with some incidence of cross-resistance within insecticide classes [20]. In Pakistan it is a common practice to mix conventional and newer insecticides to control insect pests of economically important crops; therefore, it would be premature to conclude that a cross-resistance exists between these compounds. Spinosad and lambda-cyhalothrin possesses high efficacy against the damaging larval stage of *R. ferrugineus* in laboratory assays, as in the present work [14], and their inclusion in control programs using the most effective application method would be worth considering. Treatment strategies with chemical insecticides which include spinosad in control programs with changed pattern would be worth considering. Moreover, integrated use of microbial control agents with newer insecticides with novel modes of action could successfully replace insecticides to which resistance has developed in field control programs.

## Acknowledgments

We are thankful for a grant (2AV1-263) to Higher Education Commission, Islamabad, Pakistan for this study. The part of data is presented and published in proceedings of 1st International Conference on Integrated Protection of Date Palms held at Arabian Gulf University, Manama, Kingdom of Bahrain.

## Author Contributions

**Conceptualization:** Waqas Wakil.

**Data curation:** Waqas Wakil, Muhammad Yasin.

**Formal analysis:** Waqas Wakil, Muhammad Yasin, Mirza Abdul Qayyum.

**Funding acquisition:** Waqas Wakil, Muhammad Yasin.

**Investigation:** Waqas Wakil, Muhammad Yasin.

**Methodology:** Waqas Wakil.

**Project administration:** Waqas Wakil.

**Resources:** Muhammad Yasin.

**Software:** Muhammad Yasin.

**Supervision:** Waqas Wakil.

**Writing – original draft:** Waqas Wakil, Muhammad Yasin.

**Writing – review & editing:** Waqas Wakil, Mirza Abdul Qayyum, Muhammad Usman Ghanfar, Abdullah M. Al-Sadi, Geoffrey O. Bedford, Yong Jung Kwon.

## References

1. Faleiro JR. A review of the issues and management of the red palm weevil *Rhynchophorus ferrugineus* (Coleoptera: Rhynchophoridae) in coconut and date palm during the last one hundred years. *Inter. J. Trop. Insect Sci.* 2006; 26: 135–154.
2. Dembilio Ó, Jaques JA. Biology and management of red palm weevil. In: Wakil W, Faleiro JR, Miller TA, editors. *Sustainable Pest Management in Date Palm: Current Status and Emerging Challenges, Sustainability in Plant and Crop Protection*. Springer International Publishing Switzerland. 2015. pp. 13–36.
3. Wakil W, Faleiro JR, Miller TA. *Sustainable Pest Management in Date Palm: Current Status and Emerging Challenges, Sustainability in Plant and Crop Protection*. Springer International Publishing Switzerland. 2015. p. 445.
4. Rajamanickam K, Kennedy JS, Christopher A. Certain components of integrated management for red palm weevil, *Rhynchophorus ferrugineus* F. (Curculionidae: Coleoptera) on coconut. *Mededelingen Faculteit Landbouwkundige en Toegepaste Biologische Wetenschappen*. 1995; 60: 803–805.
5. Avand Faghieh A. The biology of red palm weevil, *Rhynchophorus ferrugineus* Oliv. (Coleoptera, Curculionidae) in Saravan region (Sistan and Baluchistan Province, Iran). *Appl. Entomol. Phytopathol.* 1996; 63: 16–18.
6. Azam KM, Razvi SA, Al-Mahmuli I. Survey of red palm weevil, *Rhynchophorus ferrugineus* Oliver. Infestation in date palm in Oman. In: *2nd International Conference on Date Palms, Al-Ain, UAE*. 2001. pp. 25–27.
7. Ferry M, Gomez S. The red palm weevil in the Mediterranean area. *Palms*. 2002; 46: 172–178.
8. Faleiro JR, Ben Abdullah A, El-Bellaj M, Al Ajlan AM, Oihabi A. Threat of red palm weevil, *Rhynchophorus ferrugineus* (Olivier) to date palm plantations in North Africa. *Arab J. Plant Prot.* 2012; 30: 274–280.
9. Hussain A, Haq MRU, Al-Jabr AM, Al-Ayied HY. Managing invasive populations of red palm weevil: A worldwide perspective. *J. Food Agric. Environ.* 2013; 11: 456–463.
10. Cabello TP, de la Peña J, Barranco P, Belda J. Laboratory evaluation of imidacloprid and oxamyl against *Rhynchophorus ferrugineus*. *Tests of Agrochem. Culti.* 1997; 18: 6–7.
11. Ajlann AM, Shawir MS, Abo-El-Saad MM, Rezk MA, Abdulslam KS. Laboratory evaluation of certain organophosphorus insecticides against the red palm weevil, *Rhynchophorus ferrugineus* (Olivier). *Sci. J.* 2002; 1: 15–16.
12. Azam KM, Razvi SA, Al-Mahmuli I. Management of red date palm weevil, *Rhynchophorus ferrugineus* Oliver on date palm by prophylactic measures. In: *Proceedings of first Workshop on Control of Date Palm Red Weevil*. Ministry of Higher Education, King Faisal University, Date Palm Research Centre, Kingdom of Saudi Arabia. 2000. pp. 26–34.
13. Khalifa O, El-Assal AH, Ezaby FAA, Murse MA, Nuaimi SMA, Al-Zehli NS. Database for infestation of date palm by red palm weevil (*Rhynchophorus ferrugineus* (Olivier)). In: *2nd International Conference on Date Palms, Al-Ain, UAE*. 2001. pp. 25–27.
14. Abo-El-Saad MM, Ajlan AM, Shawir MS, Abdul-Salam KS, Rezk MA. Comparative toxicity of four pyrethroid insecticides against red palm weevil, *Rhynchophorus ferrugineus* (Olivier) under laboratory conditions. *J. Pest Cont. Environ. Sci.* 2001; 9: 63–76.
15. Abdulsalam KS, Shawir MS, Abo-El-Saad MM, Rezk MA, Ajlan AM. Regent (fipronil) as a candidate insecticide to control red palm weevil (*Rhynchophorus ferrugineus* Olivier). *Ann. Agric.* 2001; 46: 841–849.
16. Al-Rajhy DH, Hussein HI, Al-Shawaf AMA. Insecticidal activity of carbaryl and its mixture with piperonyl-butoxide against red palm weevil *Rhynchophorus ferrugineus* (Olivier) (Curculionidae: Coleoptera) and their effects on acetylcholinesterase activity. *Pak. J. Biol. Sci.* 2005; 8: 679–682.
17. Kaakeh W. Toxicity of imidacloprid to developmental stages of *Rhynchophorus ferrugineus* (Curculionidae: Coleoptera): Laboratory and field tests. *Crop Prot.* 2006; 25: 432–439.
18. Llácer E, Jacas JA. Efficacy of phosphine as a fumigant against *Rhynchophorus ferrugineus* (Coleoptera: Curculionidae) in palms. *Spanish J. Agri. Res.* 2010; 8: 775–779.
19. Shar MU, Rustamani MA, Nizamani SM, Bhutto LA. Red palm weevil (*Rhynchophorus ferrugineus* Olivier) infestation and its chemical control in Sindh province of Pakistan. *Afri. J. Agric. Res.* 2012; 11: 1666–1673.
20. Ahmad M, Arif MI, Ahmad Z. Susceptibility of *Helicoverpa armigera* (Lepidoptera: Noctuidae) to new chemistries in Pakistan. *Crop Prot.* 2003, 22: 539–544.

21. Food and Agriculture Organization (FAO). Tentative method for adults of some major pest species of stored cereals with methyl bromide and phosphine, FAO method no. 16. FAO Plant Prot. Bull. 1975; 23: 12–25.
22. Martín MM, Cabello T. Manejo de la cría del picudo rojo de la palmera, *Rhynchophorus ferrugineus* (Olivier, 1790) (Coleoptera, Dryophthoridae), en dieta artificial y efectos en su biometría y biología. Boletín de Sanidad Vegetal de Plagas. 2006; 32: 631–641.
23. IRAC. IRAC Susceptibility test methods series for Armyworms (*Spodoptera exigua*, *Spodoptera frugiperda*, *Spodoptera littoralis*, *Spodoptera litura*, *Spodoptera eridania*) Bollworms (*Helicoverpa armigera*, *Heliothis virescens*, *Helicoverpa zea*), Version 3.2; 2017. ([http://www.ircac-online.org/content/uploads/Method\\_020\\_v3.2.pdf](http://www.ircac-online.org/content/uploads/Method_020_v3.2.pdf)). (assessed on: January, 2017).
24. Abbott WS. A method of computing the effectiveness of an insecticide. J. Econ. Entomol. 1925; 18: 265–267.
25. LeOra. Polo plus, A User's Guide to Probit and Logit Analysis. LeOra Software, Berkeley, California, USA. 2003.
26. Ahmad M, Arif MI. Resistance of Pakistani field populations of spotted bollworm *Earias vittella* (Lepidoptera: Noctuidae) to pyrethroid, organophosphorus and new chemical insecticides. Pest Manag. Sci. 2009; 65: 433–439 <https://doi.org/10.1002/ps.1702> PMID: 19165729
27. Milne D. The date palm and its cultivation in the Punjab. The Punjab Government. 1918. p. 153.
28. Qayyum MA, Wakil W, Arif MJ, Sahi ST, Saeed NA, Russell DA. Multiple resistances against formulated organophosphates, pyrethroids, and newer-chemistry insecticides in populations of *Helicoverpa armigera* (Lepidoptera: Noctuidae) from Pakistan. J. Econ. Entomol. 2015; 108: 186–193.
29. Ahmad M, Arif MI, Ahmad Z, Denholm I. Cotton whitefly (*Bemisia tabaci*) resistance to organophosphate and pyrethroid insecticides in Pakistan. Pest Manag. Sci. 2001; 58: 203–208.
30. Sayyed AH, Ahmad M, Saleem MA. Cross-resistance and genetics of resistance to indoxacarb in *Spodoptera litura* (Lepidoptera: Noctuidae). J. Econ. Entomol. 2008; 101: 472–479. PMID: 18459413
31. Ahmad M. Potentiation between pyrethroid and organophosphate insecticides in resistant field populations of cotton bollworm *Helicoverpa armigera* (Lepidoptera: Noctuidae) in Pakistan. Pesti. Biochem. Physiol. 2008; 91: 24–31.
32. Ishtiaq M, Saleem MA, Razaq M. Monitoring of resistance in *Spodoptera exigua* (Lepidoptera: Noctuidae) from four districts of the southern Punjab, Pakistan to four conventional and six new chemistry insecticides. Crop Prot. 2012; 33: 13–20.
33. Ahmad M, Akhtar S. Development of insecticide resistance in field populations of *Brevicoryne brassicae* (Homoptera: Aphididae) in Pakistan. J. Econ. Entomol. 2013; 106: 954–958. PMID: 23786087
34. Ahmad M, Mehmood R. Monitoring of resistance to new chemistry insecticides in *Spodoptera litura* (Lepidoptera: Noctuidae) in Pakistan. J. Econ. Entomol. 2015; 108: 1279–1288. <https://doi.org/10.1093/jee/tov085> PMID: 26470256
35. Al-Ayedh H, Hussain A, Rizwan-ul-Haq M, Al-Jabr AM. Status of insecticide resistance in field-collected populations of *Rhynchophorus ferrugineus* (Olivier) (Coleoptera: Curculionidae). Int. J. Agric. Biol. 2015; 17: 1–9.
36. Opit GP, Phillip TW, Aikins MJ, Hasan MM. Phosphine resistance in *Tribolium castaneum* and *Rhyzopertha dominica* from stored wheat in Oklahoma. J. Econ. Entomol. 2012; 105: 1107–1114. PMID: 22928286
37. Benhalima H, Chaudhry MQ, Mills KA, Price NR. Phosphine resistance in stored-product insects collected from various grain storage facilities in Morocco. J. Stored Prod. Res. 2004; 40: 241–249.
